# Supplementary material for: Long Intergenic Noncoding RNAs Affect Biological Pathways Underlying Autoimmune and Neurodegenerative Disorders
Source: PubMed Central journal article supplement (PMC9395482; doi:10.1007/s12035-022-02941-0), 2022-07-07
Supplement: 12035_2022_2941_MOESM1_ESM.pdf [file 12035_2022_2941_MOESM1_ESM.pdf]

Title: Long intergenic noncoding RNAs affect biological pathways underlying autoimmune and neurodegenerative disorders

Journal name: Molecular Neurobiology

Patrycja Plewka<sup>1,2</sup>, Katarzyna Dorota Raczynska<sup>1,2</sup>

<sup>1</sup>Department of Gene Expression, Institute of Molecular Biology and Biotechnology, Faculty of Biology, Adam Mickiewicz University, Poznan, Poland

<sup>2</sup>Center for Advanced Technology, Adam Mickiewicz University, Poznan, Poland

Corresponding author

Email: [doracz@amu.edu.pl](mailto:doracz@amu.edu.pl)

Table S1. lincRNA/miRNA/mRNA axes involved in the pathogenesis of autoimmune and neurodegenerative diseases.

| lincRNA       | miRNA                                               | Target                        | Function/molecular pathway                                                                                            | References |
|---------------|-----------------------------------------------------|-------------------------------|-----------------------------------------------------------------------------------------------------------------------|------------|
| RP11-29G8.3 ↑ | miR-200a, miR-141, miR-24-3p, miR-15a and miR-15b ↓ | Inflammatory response genes ↑ | Inflammatory response in MS                                                                                           | [1]        |
| PVT1 ↓        | miR-200a ↑                                          | SMAD2, GATA3, FOXO3 ↓         | TH17 cell differentiation in MS                                                                                       | [2–4]      |
| PVT1 ↑        | miR-145-5p ↓                                        | -                             | Cell proliferation, apoptosis, inflammation by regulation of IL-1 $\beta$ and IL-6 level in RA                        | [5]        |
| GAPLINC ↑     | miR-382-5p, miR-575 ↓                               | -                             | -                                                                                                                     | [6]        |
| PICRAR ↑      | miR-4701-5p ↓                                       | -                             | Cell proliferation, migration and invasion in RA                                                                      | [7]        |
| MIAT ↑        | miR-222 ↓                                           | CFHR5 ↑                       | Regulation of the level of anti-dsDNA antibody and complement component C3b in SLE                                    | [8]        |
|               | miR-221-3p ↓                                        | TGFBR1 ↑                      | Apoptosis, cell viability, inflammation and oxidative stress in PD                                                    | [9]        |
| MIAT ↓        | miR-34-5p ↑                                         | SYT1 ↓                        | Apoptosis, cell viability and Parkin and TH expression in PD<br>Neuron damage and motor performance in PD mice        | [10]       |
|               | miR-132 ↑                                           | SIRT1 ↓                       | Apoptosis, cell viability and oxidative stress in PD                                                                  | [11]       |
| lincRNA-p21 ↑ | miR-625 ↓                                           | TRPM2 ↑                       | Cell viability, apoptosis, oxidative stress and inflammation in PD                                                    | [12]       |
|               | miR-1277-5p ↓                                       | $\alpha$ -synuclein ↑         | Cell viability and apoptosis in PD                                                                                    | [13]       |
|               | miR-181 ↓                                           | PKC- $\delta$ ↑               | p53-dependent microglial activation and inflammation-induced neurotoxicity in PD                                      | [14]       |
| H19 ↓         | miR-301b-3p ↑                                       | HPRT1 ↓                       | Neuronal loss and apoptosis via HPRT1-dependent regulation of Wnt/ $\beta$ -catenin signaling pathway in PD           | [15]       |
|               | miR-585-3p ↑                                        | PIK3R3 ↓                      | Apoptosis, cell viability and proliferation in PD<br>Neuronal damage and behavioral phenotype in PD mice              | [16]       |
| H19 ↑         | miR-129 ↓                                           | HMG1B1 ↑                      | Cell viability, (cell cycle) proliferation, apoptosis and oxidative stress in AD                                      | [17]       |
| NORAD ↓       | miR-204-5p ↑                                        | SLC5A3 ↓                      | Cell viability, apoptosis, oxidative stress and inflammation in PD                                                    | [18]       |
| UCA1 ↑        | miR-423-5p ↓                                        | KCTD20 ↑                      | Apoptosis, cell viability, inflammation and oxidative stress in PD                                                    | [19]       |
| LINC01311 ↓   | miR-146a-5p ↑                                       | -                             | Apoptosis, proliferation, autophagy, APP accumulation in AD                                                           | [20]       |
| LINC00507 ↑   | miR-181c-5p ↓                                       | MAPT, TTBK1 ↑                 | Tau protein hyperphosphorylation through the regulation of the p25/p35/Cdk5 and GSK3 $\beta$ signaling pathways in AD | [21]       |

|          |               |                               |                                                                                                                                                                  |      |
|----------|---------------|-------------------------------|------------------------------------------------------------------------------------------------------------------------------------------------------------------|------|
| NEAT1 ↑  | miR-544a ↓    | RUNX3 ↑                       | Th1/Th2 balance, inflammatory response in MS                                                                                                                     | [22] |
|          | miR-144-3p ↓  | ROCK2 ↑                       | Inflammation by activating Wnt/ $\beta$ -catenin signaling pathway in RA                                                                                         | [23] |
|          | miR-204-5p ↓  | -                             | Proliferation, apoptosis and secretion of inflammatory cytokines IL-1 $\beta$ and IL-6 in RA                                                                     | [24] |
|          | miR-124 ↓     | -                             | Cell viability, apoptosis and inflammation in PD                                                                                                                 | [25] |
|          |               | BACE1 ↑                       | Apoptosis in AD                                                                                                                                                  | [26] |
|          | miR-374c-5p ↓ | -                             | Proliferation, apoptosis and autophagy in PD                                                                                                                     | [28] |
|          | miR-1277-5p ↓ | ARHGAP26 ↑                    | Cell viability, apoptosis, oxidative stress and inflammation in PD                                                                                               | [29] |
|          | miR-212-3p ↓  | AXIN1 ↑                       | Cell viability, apoptosis and inflammation in PD                                                                                                                 | [30] |
|          | miR-1301-3p ↓ | GJB1 ↑                        | Apoptosis and inflammation in PD                                                                                                                                 | [25] |
|          | miR-124-3p ↓  | PDE4B ↑                       | Cell viability, apoptosis, inflammation in PD                                                                                                                    | [27] |
|          | miR-212-5p ↓  | RAB3IP ↑                      | Cell viability, apoptosis, oxidative stress and inflammation in PD                                                                                               | [31] |
|          | miR-519a-3p ↓ | SP1 ↑                         | Apoptosis, cell viability and inflammation in PD                                                                                                                 | [32] |
|          | miR-107 ↓     | Endophilin-1 ↑                | Cell viability and apoptosis in AD                                                                                                                               | [33] |
|          | miR-27a-3p ↓  | -                             | Cell viability, apoptosis, APP, A $\beta$ , BACE1, Tau, p-Tau and cleaved caspase abundance in AD<br>Cognitive functions in AD rats                              | [34] |
| MALAT1 ↑ | miR-210-3p ↓  | RUNX3 ↑                       | Th1/Th2 balance, regulation of inflammation in MS                                                                                                                | [22] |
|          | miR-124 ↓     | -                             | Apoptosis in PD                                                                                                                                                  | [35] |
|          | miR-205-5p ↓  | LRRK2 ↑                       | Cell viability and apoptosis in PD                                                                                                                               | [36] |
|          | miR-135b-5p ↓ | GPNMB ↑                       | Proliferation (cell viability) and apoptosis in PD                                                                                                               | [37] |
|          | miR-124-3p ↓  | DAPK1 ↑                       | Cell viability and apoptosis in PD<br>Behavioral phenotype in PD mice                                                                                            | [38] |
| MALAT1 ↓ | miR-125b ↑    | FOXQ1 ↓                       | Cell viability, apoptosis, inflammation and neurite outgrowth by regulating CDK5 and p35/25 in AD                                                                | [39] |
|          | miR-30b ↑     | CNR1 ↓                        | Cell viability, cell cycle, apoptosis and inflammation by regulating of PI3K/AKT signaling pathway in AD<br>Neuronal damage in AD rat hippocampus                | [40] |
| TUG1 ↑   | miR-152-3p ↓  | PTEN ↑                        | Cell viability, apoptosis, oxidative stress and inflammation in PD<br>Neuronal damage and neuroinflammation in PD mice                                           | [41] |
|          | miR-15a ↓     | ROCK1 ↑                       | Cell viability, apoptosis and oxidative stress in hippocampal neurons in AD<br>Cognitive functions and pathological injury of hippocampal tissues in AD mice     | [42] |
|          | miR-34a-5p ↓  | LDHA ↑                        | Glucose metabolism in RA                                                                                                                                         | [43] |
|          | miR-20a-5p ↓  | Inflammatory response genes ↑ | Inflammatory response in MS                                                                                                                                      | [1]  |
| XIST ↑   | let-7c-5p ↓   | STAT3 ↑                       | Proliferation, differentiation, and inflammatory response in osteoblasts by regulating TNF- $\alpha$ , IL-2, and IL-6 levels and osteogenic- related genes in RA | [44] |
|          | miR-199a-3p ↓ | Sp1 ↑                         | Apoptosis, cell viability, cell cycle, and LRRK2 and $\alpha$ -synuclein expression in PD<br>Brain injury and cognitive functions in PD mice                     | [45] |
|          | miR-124 ↓     | BACE1 ↑                       | Apoptosis in AD                                                                                                                                                  | [46] |
|          | miR-132 ↓     | -                             | Cell viability, apoptosis and oxidative stress in AD                                                                                                             | [47] |

## References

1. Santoro M, Nociti V, Lucchini M et al (2020) A pilot study of lncRNAs expression profile in serum of progressive multiple sclerosis patients. *Eur Rev Med Pharmacol Sci* 24:3267–3273. [https://doi.org/10.26355/eurrev\\_202003\\_20694](https://doi.org/10.26355/eurrev_202003_20694)
2. Eftekharian MM, Ghafouri-Fard S, Soudyab M et al (2017) Expression Analysis of Long Non-coding RNAs in the Blood of Multiple Sclerosis Patients. *J Mol Neurosci* 63:333–341. <https://doi.org/10.1007/s12031-017-0982-1>
3. Colombo T, Farina L, Macino G, Paci P (2015) PVT1: a rising star among oncogenic long noncoding RNAs. *Biomed Res Int* 2015:304208. <https://doi.org/10.1155/2015/304208>
4. Naghavian R, Ghaedi K, Kiani-Esfahani A et al (2015) miR-141 and miR-200a, Revelation of New Possible Players in Modulation of Th17/Treg Differentiation and Pathogenesis of Multiple Sclerosis. *PLoS One* 10:e0124555. <https://doi.org/10.1371/JOURNAL.PONE.0124555>
5. Tang J, Yi S, Liu Y (2020) Long non-coding RNA PVT1 can regulate the proliferation and inflammatory responses of rheumatoid arthritis fibroblast-like synoviocytes by targeting microRNA-145-5p. *Hum Cell* 33:1081–1090. <https://doi.org/10.1007/s13577-020-00419-6>
6. Mo BY, Guo XH, Yang MR et al (2018) Long Non-Coding RNA GAPLINC Promotes Tumor-Like Biologic Behaviors of Fibroblast-Like Synoviocytes as MicroRNA Sponging in Rheumatoid Arthritis Patients. *Front Immunol* 9:702. <https://doi.org/10.3389/fimmu.2018.00702>
7. Bi X, Guo XH, Mo BY et al (2019) lncRNA PICSAR promotes cell proliferation, migration and invasion of fibroblast-like synoviocytes by sponging miRNA-4701-5p in rheumatoid arthritis. *EBioMedicine* 50:408–420. <https://doi.org/10.1016/j.ebiom.2019.11.024>
8. Zhang Y, Xie L, Lu W et al (2021) lncRNA MIAT enhances systemic lupus erythematosus by upregulating CFHR5 expression via miR-222 degradation. *Cent Eur J Immunol* 46:17-26. <https://doi.org/10.5114/CEJI.2021.105242>
9. Lang Y, Zhang H, Yu H et al (2022) Long non-coding RNA myocardial infarction-associated transcript promotes 1-Methyl-4-phenylpyridinium ion-induced neuronal inflammation and oxidative stress in Parkinson's disease through regulating microRNA-221-3p/ transforming growth factor /nuclear factor E2-related factor 2 axis. *Bioengineered* 13:930–940. <https://doi.org/10.1080/21655979.2021.2015527>
10. Shen Y, Cui X, Hu Y et al (2021) lncRNA-MIAT regulates the growth of SHSY5Y cells by regulating the miR-34-5p-SYT1 axis and exerts a neuroprotective effect in a mouse model of Parkinson's disease. *Am J Transl Res* 13:9993-10013.
11. Xu X, Zhang Y, Kang Y et al (2021) lncRNA MIAT Inhibits MPP+-Induced Neuronal Damage Through Regulating the miR-132/SIRT1 Axis in PC12 Cells. *Neurochem Res* 46:3365–3374. <https://doi.org/10.1007/s11064-021-03437-4>
12. Ding XM, Zhao LJ, Qiao HY et al (2019) Long non-coding RNA-p21 regulates MPP+-induced neuronal injury by targeting miR-625 and derepressing TRPM2 in SH-SY5Y cells. *Chem Biol Interact* 307:73–81. <https://doi.org/10.1016/J.CBI.2019.04.017>
13. Xu X, Zhuang C, Wu Z et al (2018) lincRNA-p21 Inhibits Cell Viability and Promotes Cell Apoptosis in Parkinson's Disease through Activating  $\alpha$ -Synuclein Expression. *Biomed Res Int* 2018:8181374. <https://doi.org/10.1155/2018/8181374>

14. Ye Y, He X, Lu F et al (2018) A lincRNA-p21/miR-181 family feedback loop regulates microglial activation during systemic LPS- and MPTP- induced neuroinflammation. *Cell Death Dis* 9:803. <https://doi.org/10.1038/s41419-018-0821-5>
15. Jiang J, Piao X, Hu S et al (2020) LncRNA H19 diminishes dopaminergic neuron loss by mediating microRNA-301b-3p in Parkinson's disease via the HPRT1-mediated Wnt/ $\beta$ -catenin signaling pathway. *Aging (Albany NY)* 12:8820. <https://doi.org/10.18632/AGING.102877>
16. Zhang Y, Xia Q, Lin J (2020) LncRNA H19 Attenuates Apoptosis in MPTP-Induced Parkinson's Disease Through Regulating miR-585-3p/PIK3R3. *Neurochem Res* 45:1700–1710. <https://doi.org/10.1007/s11064-020-03035-w>
17. Zhang Y-Y, Bao H-L, Dong L-X et al (2021) Silenced lncRNA H19 and up-regulated microRNA-129 accelerates viability and restrains apoptosis of PC12 cells induced by A $\beta$ 25-35 in a cellular model of Alzheimer's disease. *Cell Cycle* 20:112–125. <https://doi.org/10.1080/15384101.2020.1863681>
18. Zhou S, Zhang D, Guo J et al (2020) Long non-coding RNA NORAD functions as a microRNA-204-5p sponge to repress the progression of Parkinson's disease in vitro by increasing the solute carrier family 5 member 3 expression. *IUBMB Life* 72:2045–2055. <https://doi.org/10.1002/IUB.2344>
19. Zheng Y, Liu J, Zhuang J et al (2021) Silencing of UCA1 Protects Against MPP+-Induced Cytotoxicity in SK-N-SH Cells via Modulating KCTD20 Expression by Sponging miR-423-5p. *Neurochem Res* 46:878–887. <https://doi.org/10.1007/s11064-020-03214-9>
20. Fan Y, Zhang J, Zhuang X et al (2021) Epigenetic transcripts of LINC01311 and hsa-miR-146a-5p regulate neural development in a cellular model of Alzheimer's disease. *IUBMB Life* 73:916–926. <https://doi.org/10.1002/IUB.2472>
21. Yan Y, Yan H, Teng Y et al (2020) Long non-coding RNA 00507/miRNA-181c-5p/TTBK1/MAPT axis regulates tau hyperphosphorylation in Alzheimer's disease. *J Gene Med* 22:e3268. <https://doi.org/10.1002/JGM.3268>
22. Azari H, Karimi E, Shekari M et al (2021) Construction of a lncRNA-miRNA-mRNA network to determine the key regulators of the Th1/Th2 imbalance in multiple sclerosis. *Epigenomics* 13:1797–1815. <https://doi.org/10.2217/epi-2021-0296>
23. Liu R, Jiang C, Li J et al (2021) Serum-derived exosomes containing NEAT1 promote the occurrence of rheumatoid arthritis through regulation of miR-144-3p/ROCK2 axis. *Ther Adv Chronic Dis* 12:2040622321991705. <https://doi.org/10.1177/2040622321991705>
24. Xiao J, Wang R, Zhou W et al (2021) LncRNA NEAT1 regulates the proliferation and production of the inflammatory cytokines in rheumatoid arthritis fibroblast-like synoviocytes by targeting miR-204-5p. *Hum Cell* 34:372–382. <https://doi.org/10.1007/s13577-020-00461-4>
25. Boros FA, Vécsei L, Klivényi P (2021) NEAT1 on the Field of Parkinson's Disease: Offense, Defense, or a Player on the Bench? *J Parkinsons Dis* 11:123-138. <https://doi.org/10.3233/JPD-202374>
26. Zhao M-Y, Wang G-Q, Wang N-N et al (2019) The long-non-coding RNA NEAT1 is a novel target for Alzheimer's disease progression via miR-124/BACE1 axis. *Neurol Res* 41:489–497. <https://doi.org/10.1080/01616412.2018.1548747>

27. Chen M-Y, Fan K, Zhao L-J et al (2021) Long non-coding RNA nuclear enriched abundant transcript 1 (NEAT1) sponges microRNA-124-3p to up-regulate phosphodiesterase 4B (PDE4B) to accelerate the progression of Parkinson's disease. *Bioengineered* 12:708–719. <https://doi.org/10.1080/21655979.2021.1883279>
28. Dong L i, Zheng Y, Gao L, Luo X (2021) lncRNA NEAT1 prompts autophagy and apoptosis in MPTP-induced Parkinson's disease by impairing miR-374c-5p. *Acta Biochim Biophys Sin (Shanghai)* 53:870–882. <https://doi.org/10.1093/ABBS/GMAB055>
29. Zhou S, Zhang D, Guo J et al (2021) Deficiency of NEAT1 prevented MPP<sup>+</sup>-induced inflammatory response, oxidative stress and apoptosis in dopaminergic SK-N-SH neuroblastoma cells via miR-1277-5p/ARHGAP26 axis. *Brain Res* 1750:147156. <https://doi.org/10.1016/J.BRAINRES.2020.147156>
30. Liu T, Zhang Y, Liu W, Zhao J (2020) lncRNA NEAT1 Regulates the Development of Parkinson's Disease by Targeting AXIN1 Via Sponging miR-212-3p. *Neurochem Res* 46:230–240. <https://doi.org/10.1007/S11064-020-03157-1>
31. Liu R, Li F, Zhao W (2020) Long noncoding RNA NEAT1 knockdown inhibits MPP<sup>+</sup>-induced apoptosis, inflammation and cytotoxicity in SK-N-SH cells by regulating miR-212-5p/RAB3IP axis. *Neurosci Lett* 731:135060. <https://doi.org/10.1016/J.NEULET.2020.135060>
32. Wang S, Wen Q, Xiong B et al (2021) Long Noncoding RNA NEAT1 Knockdown Ameliorates 1-Methyl-4-Phenylpyridine-Induced Cell Injury Through MicroRNA-519a-3p/SP1 Axis in Parkinson Disease. *World Neurosurg* 156:e93–e103. <https://doi.org/10.1016/J.WNEU.2021.08.147>
33. Ke S, Yang Z, Yang F et al (2019) Long Noncoding RNA NEAT1 Aggravates A $\beta$ -Induced Neuronal Damage by Targeting miR-107 in Alzheimer's Disease. *Yonsei Med J* 60:640-650. <https://doi.org/10.3349/YMJ.2019.60.7.640>
34. Dong L-X, Zhang Y-Y, Bao H-L et al (2021) lncRNA NEAT1 promotes Alzheimer's disease by down regulating micro-27a-3p. *Am J Transl Res* 13:8885-8896
35. Liu W, Zhang Q, Zhang J, et al (2017) Long non-coding RNA MALAT1 contributes to cell apoptosis by sponging miR-124 in Parkinson disease. *Cell Biosci* 7:19. <https://doi.org/10.1186/S13578-017-0147-5>
36. Chen Q, Huang X, Li R (2018) lncRNA MALAT1/miR-205-5p axis regulates MPP<sup>+</sup>-induced cell apoptosis in MN9D cells by directly targeting LRRK2. *Am J Transl Res* 10:563-572
37. Lv K, Liu Y, Zheng Y et al (2021) Long non-coding RNA MALAT1 regulates cell proliferation and apoptosis via miR-135b-5p/GPNMB axis in Parkinson's disease cell model. *Biol Res* 54:10. <https://doi.org/10.1186/S40659-021-00332-8>
38. Lu Y, Gong Z, Jin X, et al (2020) lncRNA MALAT1 targeting miR-124-3p regulates DAPK1 expression contributes to cell apoptosis in Parkinson's Disease. *J Cell Biochem* 121:4838–4848. <https://doi.org/10.1002/JCB.29711>
39. Ma P, Li Y, Zhang W et al (2019) Long Non-coding RNA MALAT1 Inhibits Neuron Apoptosis and Neuroinflammation While Stimulates Neurite Outgrowth and Its Correlation With MiR-125b Mediates PTGS2, CDK5 and FOXQ1 in Alzheimer's Disease. *Curr Alzheimer Res* 16:596–612. <https://doi.org/10.2174/1567205016666190725130134>

40. Li L, Xu Y, Zhao M, Gao Z (2020) Neuro-protective roles of long non-coding RNA MALAT1 in Alzheimer's disease with the involvement of the microRNA-30b/CNR1 network and the following PI3K/AKT activation. *Exp Mol Pathol* 117:104545. <https://doi.org/10.1016/J.YEXMP.2020.104545>
41. Zhai K, Liu B, Gao L (2020) Long-Noncoding RNA TUG1 Promotes Parkinson's Disease via Modulating MiR-152-3p/PTEN Pathway. *Hum Gene Ther* 31:1274–1287. <https://doi.org/10.1089/HUM.2020.106>
42. Li X, Wang S-W, LI X-L et al (2020) Knockdown of long non-coding RNA TUG1 depresses apoptosis of hippocampal neurons in Alzheimer's disease by elevating microRNA-15a and repressing ROCK1 expression. *Inflamm Res* 69:897–910. <https://doi.org/10.1007/S00011-020-01364-8>
43. Zhang M, Lu N, Guo XY et al (2021) Influences of the lncRNA TUG1-miRNA-34a-5p network on fibroblast-like synoviocytes (FLSs) dysfunction in rheumatoid arthritis through targeting the lactate dehydrogenase A (LDHA). *J Clin Lab Anal* 35:e23969. <https://doi.org/10.1002/jcla.23969>
44. Wang ZQ, Xiu DH, Jiang JL, Liu GF (2020) Long non-coding RNA XIST binding to let-7c-5p contributes to rheumatoid arthritis through its effects on proliferation and differentiation of osteoblasts via regulation of STAT3. *J Clin Lab Anal* 34:e23496. <https://doi.org/10.1002/jcla.23496>
45. Zhou Q, Zhang MM, Liu M et al (2021) LncRNA XIST sponges miR-199a-3p to modulate the Sp1/LRRK2 signal pathway to accelerate Parkinson's disease progression. *Aging (Albany NY)* 13:4115. <https://doi.org/10.18632/AGING.202378>
46. Yue D, Guanqun G, Jingxin L et al (2020) Silencing of long noncoding RNA XIST attenuated Alzheimer's disease-related BACE1 alteration through miR-124. *Cell Biol Int* 44:630–636. <https://doi.org/10.1002/CBIN.11263>
47. Wang X, Wang C, Geng C, Zhao K (2018) LncRNA XIST knockdown attenuates A $\beta$ 25-35-induced toxicity, oxidative stress, and apoptosis in primary cultured rat hippocampal neurons by targeting miR-132. *Int J Clin Exp Pathol* 11:3915-3924
